# Supplementary material
Source: Springer Nature journal article supplement (https://www.springermedizin.de/resource/supplementary/12877_2012_757_MOESM1_ESM.pdf/9440290)
Supplement: MOESM1 [file 9440290]

**Supplementary Table: Domains covered in the self-administered questionnaires at baseline, wave 1, wave 2, and wave 3**

| <b>Domains of interest (1-18)</b>                                                                                                       | <b>Baseline Pra-questionnaire (2000-2001)</b> | <b>Wave 1 HRA-O (2000-2002)</b> | <b>Wave 2 LUCAS (2007-2008)</b> | <b>Wave 3 LUCAS (2009-2010)</b> |
|-----------------------------------------------------------------------------------------------------------------------------------------|-----------------------------------------------|---------------------------------|---------------------------------|---------------------------------|
| <b>1-About participant / socio-demographic factors</b><br>e.g., age, sex, place of birth, income, native language, migration            | 2 <sup>*</sup>                                | 5 <sup>1</sup>                  | 4 <sup>1,2</sup>                | 1 <sup>1</sup>                  |
| <b>2-Alcohol and Tobacco Use</b>                                                                                                        | -                                             | 18 <sup>1</sup>                 | 1 <sup>1</sup>                  | 1 <sup>1</sup>                  |
| <b>3-Cognition</b><br>e.g., cognitive activity                                                                                          | -                                             | 10 <sup>1</sup>                 | 0 <sup>1</sup>                  | 4 <sup>1</sup>                  |
| <b>4-Environmental factors</b><br>e.g., place of living, technical aids, access to garden or parks, access to public transport          | 1 <sup>*</sup>                                | 1 <sup>1</sup>                  | 1 <sup>1</sup>                  | 6 <sup>1</sup>                  |
| <b>5-Functional Limitations</b><br>e.g., B-ADL, I-ADL, urinary incontinence, independence in daily activities                           | 2 <sup>3,4</sup>                              | 25 <sup>1</sup>                 | 12 <sup>1,5</sup>               | 13 <sup>1,5</sup>               |
| <b>6-Health Care Use, Co-Morbidity and Medical History</b><br>e.g., hospitalisation, physician visits, no. of diagnoses, ICF-short form | 5                                             | 15 <sup>6,1</sup>               | 4 <sup>6,1</sup>                | 60 <sup>6,1,7</sup>             |
| <b>7-Health measurements and symptoms</b><br>e.g., weight and height, BMI                                                               | -                                             | 39 <sup>1</sup>                 | 2 <sup>1</sup>                  | 2 <sup>1</sup>                  |
| <b>8-Injury Prevention and Fall Syndrom</b><br>e.g., fallrisk check, falls, consequences, fear of falling                               | -                                             | 7 <sup>1</sup>                  | 4 <sup>1,8</sup>                | 4 <sup>1,8</sup>                |
| <b>9-Medication</b><br>e.g., medical history, no. of medications, no. of OTC drugs                                                      | -                                             | 14 <sup>1</sup>                 | 3 <sup>1</sup>                  | 3 <sup>1</sup>                  |
| <b>10-Mobility and Urban Activity Space</b><br>e.g., motor vehicle use, public transport use, everyday life and leisure time            | -                                             | 4 <sup>1</sup>                  | 3 <sup>1,2</sup>                | 5 <sup>1,2</sup>                |
| <b>11-Nutrition and Oral Health</b><br>e.g., nutrition record, weight loss, oral health                                                 | -                                             | 39 <sup>1</sup>                 | 1 <sup>1</sup>                  | 1 <sup>1</sup>                  |

| Domains of interest (1-18)                                                                                          | Baseline Pra questionnaire (2000-2001) | Wave 1 HRA-O (2000-2002) | Wave 2 LUCAS (2007-2008) | Wave 3 LUCAS (2009-2010) |
|---------------------------------------------------------------------------------------------------------------------|----------------------------------------|--------------------------|--------------------------|--------------------------|
| 12-Pain                                                                                                             | -                                      | 26 <sup>1</sup>          | 1 <sup>1</sup>           | 3 <sup>1</sup>           |
| 13-Physical and Mental Activity                                                                                     | -                                      | 22 <sup>1</sup>          | 7 <sup>1,9</sup>         | 8 <sup>1,9</sup>         |
| 14-Preventative and Health Improving measures<br>e.g., health checkup (GP), dental checkup, immunisations, attitude | -                                      | 11 <sup>1</sup>          | 3 <sup>1</sup>           | 5 <sup>1,3</sup>         |
| 15-Psychological factors and Affect<br>e.g., depressive mood, attitude of ageing, health literacy                   | -                                      | 23 <sup>1</sup>          | 1 <sup>1</sup>           | 9 <sup>1,3</sup>         |
| 16-Self-Perceived Health and Quality of Life                                                                        | 1                                      | 1 <sup>6,1</sup>         | 1 <sup>1</sup>           | 2 <sup>1,3</sup>         |
| 17-Sensory Systems<br>e.g., vision problems, hearing problems                                                       | -                                      | 22 <sup>1</sup>          | 4 <sup>1</sup>           | 4 <sup>1</sup>           |
| 18-Social factors and Life events<br>e.g., social net, social activity, education, profession, biography            | 1                                      | 17 <sup>6,1</sup>        | 8 <sup>6,1,3</sup>       | 11 <sup>6,3,1</sup>      |

\* Age, sex and address are covered in all waves but shown in this table 1 only once at baseline

Domains are related to functional decline in community-dwelling elderly people according to a systematic review: Stuck AE, Walthert JM, Nikolaus T, Büla CJ, Hohmann C, Beck JC: **Risk factors for functional status decline in community-living elderly people: A systematic literature review.** *Soc Sci Med* 1999, 48:445-469 and a frailty framework: Bergman H, Beland F, Karunanathan S, Hummel S, Hogan D, Wolfson C: **Developing a Working Framework for Understanding Frailty 2004.** [<http://www.frail-fragile.ca>].

## References to individual questions:

<sup>1</sup>Stuck AE, Kharicha K, Dapp U, Anders J, von Renteln-Kruse W, Meier-Baumgartner HP, Harari D, Swift CG, Ivanova K, Egger M, Gillmann G, Higa J, Beck JC, Iliffe S: **Development, feasibility and performance of a health risk appraisal questionnaire for older persons.** *BMC Medical Research Methods* 2007, **7**:1 (online, open access).

<sup>2</sup>Dapp U, Lorentz Ch, Laub S, Anders J, von Renteln-Kruse W, Minder Ch, Dirksen-Fischer M: **Im Alter aktiv und gesund leben – Ergebnisse einer repräsentativen Seniorenbefragung in Hamburg.** *Z Gerontol Geriat* 2009; **42**:245-255.

<sup>3</sup>Own development, e.g. question to "Pflegestufe" according to the German health insurance law (SGB XI Soziale Pflegeversicherung. 10. Auflage, Taschenbuch Verlag 2010).

<sup>4</sup>Katz S, Ford AB, Moskowitz RW, Jackson BA, Jaffe MW: **Studies of illness in the aged. The index of ADL: A standardized measure of biological and psychosocial function.** *JAMA* 1963, **185**:914-919.

<sup>5</sup>DEGAM – Deutsche Gesellschaft für Allgemeinmedizin und Familienmedizin: *Leitlinie 5: Harninkontinenz.* Düsseldorf; 2004. [<http://www.degam-leitlinien.de>]

<sup>6</sup>Boult C, Dowd B, McCaffrey D, Boult L, Hernandez R, Krulewitch H: **Screening elders for risk of hospital admission.** *J Am Geriatr Soc* 1993, **41**:811-817.

<sup>7</sup>WHO – World Health Organization: *ICF Checklist, Version 2.1a, Clinician Form for International Classification of Functioning, Disability and Health.* 2003. [<http://www.who.int/classifications/icf/en/>]

<sup>8</sup>Anders J, Dapp U, Laub S, von Renteln-Kruse W, Juhl K: **Einschätzung der Sturzgefährdung gebrechlicher, noch selbstständig lebender, älterer Menschen.** *Z Gerontol Geriat* 2006, **39**:268-276.

<sup>9</sup>Meier-Baumgartner HP, Dapp U, Anders J: *Aktive Gesundheitsförderung im Alter: Ein neuartiges Präventionsprogramm für Senioren.* 2nd. edition. Stuttgart: Kohlhammer Verlag; 2006.
